# Supplementary material
Source: PubMed Central journal article supplement (PMC3061519)
Supplement: supp_51.11.5991_10-5395TableS2.pdf [file supp_51.11.5991_10-5395TableS2.pdf]

**Supplementary Table S2. Genes analyzed by RT-PCR**

Gene information, retinal expression, primer and pcr information for genes analyzed using RT-PCR. All primer pairs span introns. Accession numbers indicate sequences used to design primer pairs.

| <b>Gene (name)</b>                                         | <b>Retinal expression</b>                                            | <b>Forward Primer (5'-3')</b> | <b>Reverse Primer (5'-3')</b> | <b>Anneal temp (°C)</b> | <b>Product Size (bp)</b> | <b>Accession Number</b> |
|------------------------------------------------------------|----------------------------------------------------------------------|-------------------------------|-------------------------------|-------------------------|--------------------------|-------------------------|
| <i>Aif1 / Iba1</i><br>(allograft inflammatory factor 1)    | microglia                                                            | CTGGAGAACTTGGGGTTCC           | GACATCCACCTCCAATCAGG          | 60                      | 240                      | NM_019467               |
| <i>Cabp5</i><br>(calcium binding protein 5)                | bipolar cells                                                        | GATTGGTGTCAGGAGATGC           | AAGGCAGCAGGTGTCTGG            | 60                      | 245                      | NM_013877               |
| <i>Calb1</i><br>(calbindin)                                | horizontal cells                                                     | AGCTGGAAGTACAGAGATGG          | CACACAGATCTTCAGCAAAGC         | 60                      | 177                      | NM_009788               |
| <i>Car14</i><br>(carbonic anhydrase 14)                    | Müller glia                                                          | GATGCTGGGTCTAGGTGTGG          | GTTCCACGCCTCTGTGGTAGC         | 60                      | 150                      | NM_011797               |
| <i>Ccnd1</i><br>(cyclin D1)                                | Retinal progenitors<br>Müller glia following injury                  | GCACAACGCACTTTCTTTCC          | CAGCCTCTTCCTCCACTTCC          | 61                      | 162                      | NM_007631               |
| <i>Clu</i><br>(clusterin)                                  | Müller glia                                                          | GTGCTACTGAGGTGGTGGTG          | GATTCCCTCCCAGACACTCC          | 60                      | 196                      | NM_013492               |
| <i>Crx</i><br>(cone rod homeobox)                          | cone, rod<br>photoreceptors                                          | GGATGTGTATGCACGTGAGG          | GTAGAGGGTCTCGGGGATGT          | 60                      | 296                      | NM_007770               |
| <i>Dkk3</i><br>(Dickkopf 3)                                | Müller glia<br>RGC                                                   | CTGCTGGATCTCATCACCTG          | TCCCCTATGAAGCCAACATC          | 60                      | 206                      | NM_015814               |
| <i>Fgf15</i><br>(fibroblast Growth Factor 15)              | Retinal progenitors                                                  | GAAGACGATTGCCATCAAGG          | GTCCTGGAGCTGTTCTCTGG          | 60                      | 208                      | NM_008003               |
| <i>Gfap</i><br>(glial fibrillary acidic protein)           | activated<br>Müller glia; astrocytes                                 | AAGCTCCAAGATGAAACCAACCTGA     | CTTGCCACATCCATCTCCA           | 60                      | 225                      | NM_010277               |
| <i>Glu1</i><br>(glutamine synthetase; GS)                  | Müller glia                                                          | GGATAGCCCGTTTTATCTTGC         | GTGGTACTGGTGCCTCTTGC          | 60                      | 197                      | NM_008131               |
| <i>Gnl3</i><br>(nucleostemin)                              | Retinal progenitors                                                  | AGACAAACAGGATGCTGACG          | CTTGACTCGCTCTATCCAAGG         | 60                      | 195                      | NM_153547               |
| <i>Grm6</i><br>(metabotropic glutamate receptor 6; mGluR6) | ON-bipolar cells                                                     | TACGGTGTATGCCATCAAGG          | CAGTCAGTGTGGTCGTTTGG          | 60                      | 170                      | NM_173372               |
| <i>Hes1</i><br>(hairy-enhancer of split homolog 1)         | Retinal progenitors<br>(Müller cell differentiation)                 | TGAAAACACTGATTTTGGATGC        | GTGTTAACGCCCTCACACG           | 60                      | 229                      | NM_008235               |
| <i>Msi1</i><br>(musashi1)                                  | Retinal progenitors<br>Müller cells, astrocytes,<br>oligodendrocytes | GGGTCAGCAGTTACATCAGC          | TTGAGGGACAGGCAGTAGC           | 58                      | 182                      | NM_008629               |
| <i>Nes</i>                                                 | neural stem cells;                                                   | GATCGCTCAGATCCTGGAAG          | GTGCTGGTCTCTGGTATCC           | 60                      | 199                      | NM_016701               |

|                                                                      |                                                             |                        |                       |    |     |           |  |
|----------------------------------------------------------------------|-------------------------------------------------------------|------------------------|-----------------------|----|-----|-----------|--|
| (nestin)                                                             | Müller glia                                                 |                        |                       |    |     |           |  |
| <i>Opn1mw</i><br>(m cone opsin)                                      | cone photoreceptors                                         | TTGTCATGCTTTGCTACTGC   | AGCTTTGATGGATGGGACAG  | 60 | 218 | NM_008106 |  |
| <i>Opn4</i><br>(melanopsin)                                          | photo-sensitive retinal ganglion cells                      | GACCTCAGCTGGATCTCTGG   | AGGACTGTCCACTTGCTTGC  | 60 | 124 | AF147789  |  |
| <i>Pax6</i><br>(paired box gene 6)                                   | Retinal progenitors RGC, amacrine                           | CACATCAGGTTCCATGTTGG   | ACTTGGACGGGAAGTACAC   | 60 | 294 | NM_013627 |  |
| <i>Pax2</i><br>(paired box gene 2)                                   | retinal astrocytes                                          | CGTGATATGACGAGCACCAC   | ACTTAGTAAGGCGGGGTTGC  | 60 | 189 | NM_011037 |  |
| <i>Pou4f3</i><br>(Pou domain, class 4 transcription factor 3; Brn3c) | retinal ganglion cells                                      | TGCAAGAACCCAAATTCTCC   | TGGGCGAGGTAGAAGTGC    | 60 | 234 | NM_138945 |  |
| <i>Rax</i><br>(retinal and anterior homeobox gene)                   | Retinal progenitors (immature rods)                         | AGGAGAGGAGGGGAGAATCC   | CCTTCGAGAAGTCCCACTACC | 60 | 224 | NM_013833 |  |
| <i>Rlbp1</i><br>(cellular retinaldehyde binding protein; CRALBP)     | Müller glia; immature retinal astrocytes                    | TGCTGGAAAATGAGGAAACC   | CAAGAAGGGCTTGACCACAT  | 60 | 214 | NM_011254 |  |
| <i>Rho</i><br>(rhodopsin)                                            | rod photoreceptors                                          | TCTGCTGGCTTCCCTACG     | ATCTCCCAGTGGATTCTTGC  | 60 | 203 | NM_145383 |  |
| <i>Rplp0</i><br>(acidic ribosomal phosphoprotein P1)                 | all cells normalizer                                        | CGACCTGGAAGTCCAACACTAC | ATCTGCTGCATCTGCTTG    | 60 | 109 | NM_022402 |  |
| <i>Six3</i><br>(sine oculus homeobox 3)                              | Retinal progenitors RGC, some INL cells scattered ONL cells | CTCACCCCCACACAAGTAGG   | TACCGAGAGGATCGAAGTGC  | 60 | 237 | NM_011381 |  |
| <i>Sfrp2</i><br>(secreted Frizzles-related protein 2)                | Retinal progenitors                                         | CAAGAATGAGGACGACAACG   | ACAGCACGGATTTCTTCAGG  | 60 | 182 | NM_009144 |  |
| <i>Vim</i><br>(vimentin)                                             | Müller glia astrocytes                                      | ACGGTTGAGACCAGAGATGG   | TGCTGGTACTGCACTGTTGC  | 60 | 104 | NM_011701 |  |
